# Supplementary material for: Loss of hypothalamic MCH decreases food intake in amyotrophic lateral sclerosis
Source: Springer Nature journal article supplement (doi:10.1007/s00401-023-02569-x), 2023-04-14
Supplement: MOESM1 [file 25243044]

## Loss of hypothalamic MCH decreases food intake in amyotrophic lateral sclerosis

Bolborea and collaborators.

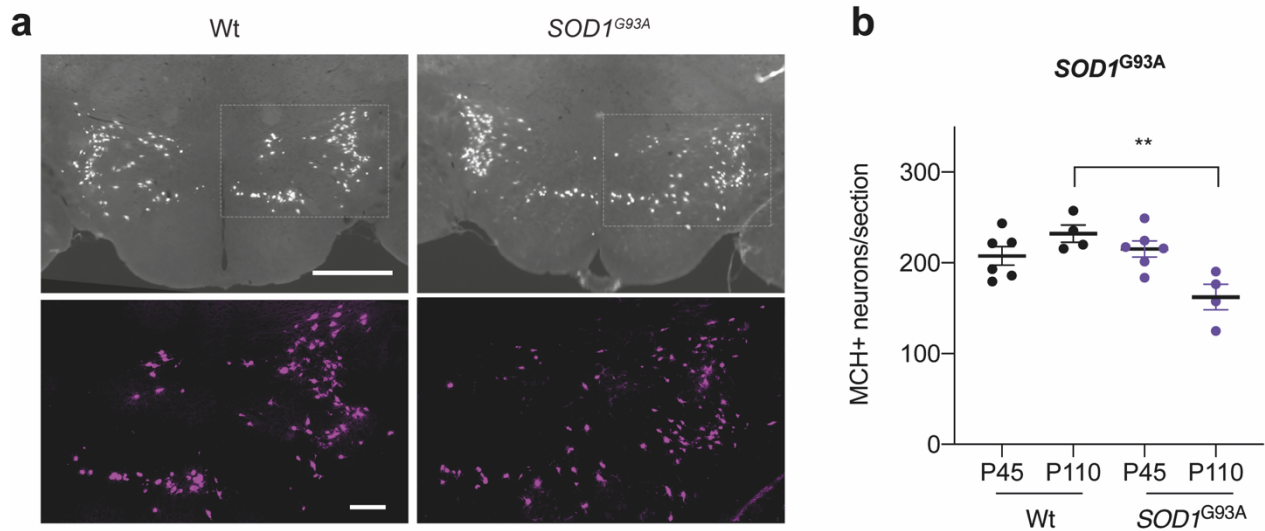

### Supplementary Figure 1: Loss of MCH positive neurons in *SOD1<sup>G93A</sup>* mice.

a: Representative MCH *in situ* hybridization in *SOD1<sup>G93A</sup>* or wild-type (WT) littermates at 110 days of age (prior to motor symptom onset). The lower panels show higher magnification of the region of interest indicated by the dashed rectangle.

Scale bar: 1000  $\mu\text{m}$  (upper row), 200  $\mu\text{m}$  (lower row).

b: Number of MCH positive cells per sections at 45 (P45, n=6) or 110 (P110, n=4) days of age. \*\*  $P$  value < 0.01, ANOVA followed by Tukey. Data are presented as mean and SEM.
